# Supplementary material for: Predicting fertility from sperm motility landscapes
Source: PubMed Central journal article supplement (PMC9519750; doi:10.1038/s42003-022-03954-0), 2022-09-28
Supplement: 42003_2022_3954_MOESM3_ESM.pdf [file 42003_2022_3954_MOESM3_ESM.pdf]

## Description of Additional Supplementary Files

**File name:** Supplementary Data

**Description:** Includes the raw data allowing to reproduce the MS results, and the raw data used in each figure.

**File name:** Supplementary Code

**Description:** The source code of data analysis Page 6 of 12 and figures conception.
